# Supplementary material
Source: publisher figshare collection journal article supplement (https://karger.figshare.com/articles/dataset/_/12451904)

Petersson et al. 2015 (C), Age: 19

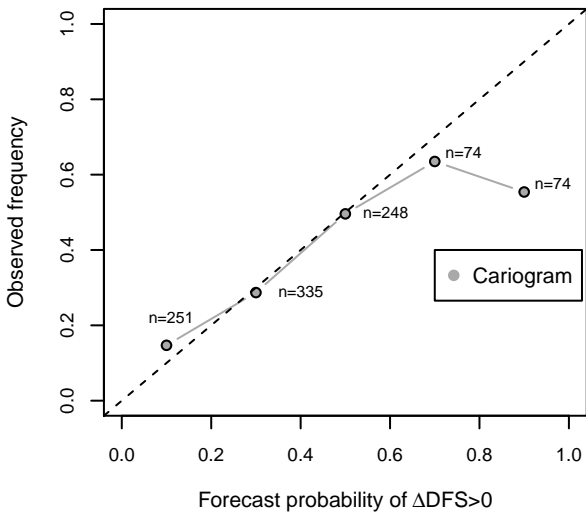

Dou et al. 2018 (C), Age: 18–29

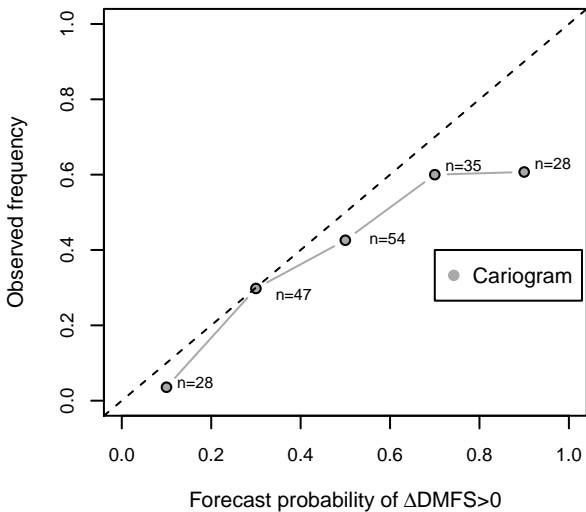

Dou et al. 2018 (S), Age: 18–29

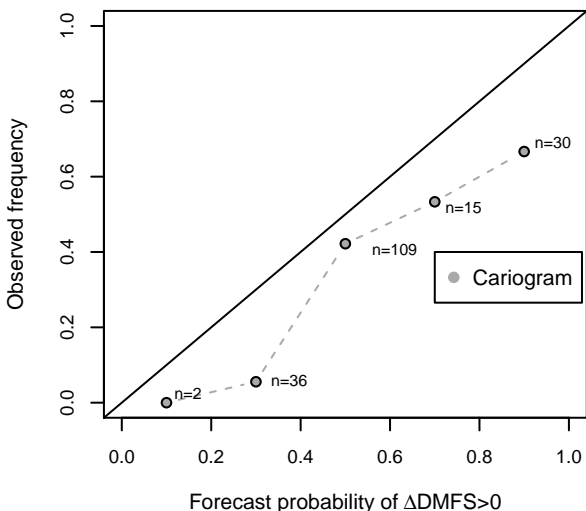

Petersson et al. 2003 (C), Age: 55,65,75

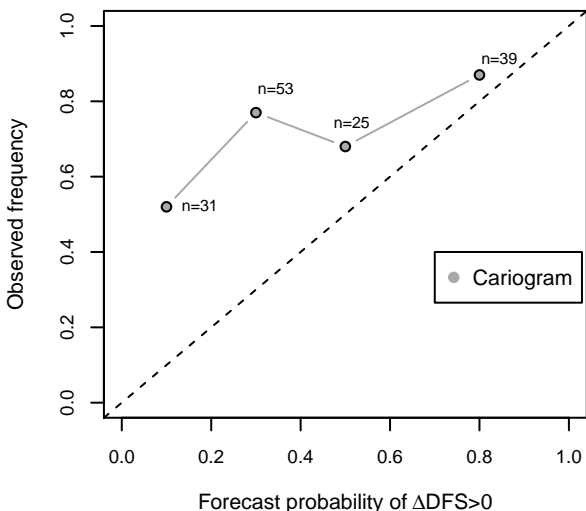

Petersson et al. 2003 (C), Age: 55,65,75

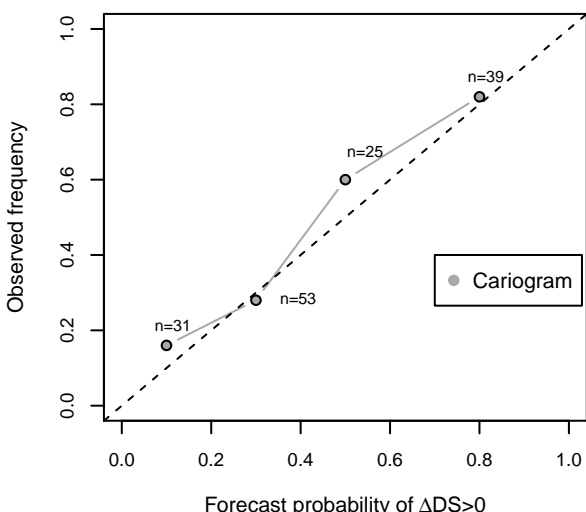

Hayes et al. 2017 (S), Age: >65

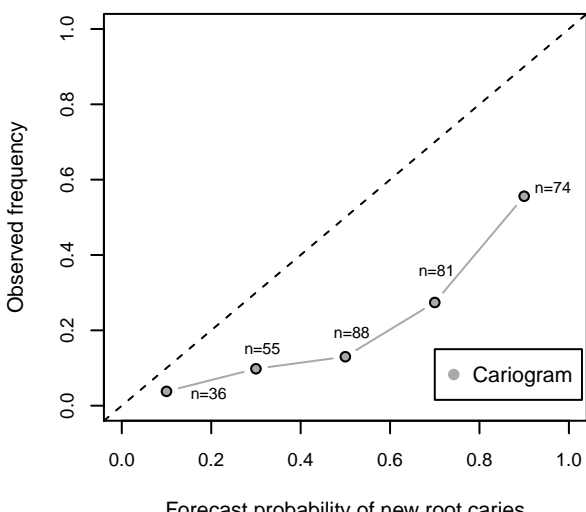

Supplement: Supplementary file 3 [file 1]
