# Supplementary material
Source: publisher figshare collection journal article supplement (https://karger.figshare.com/articles/dataset/_/12451904)

(a)

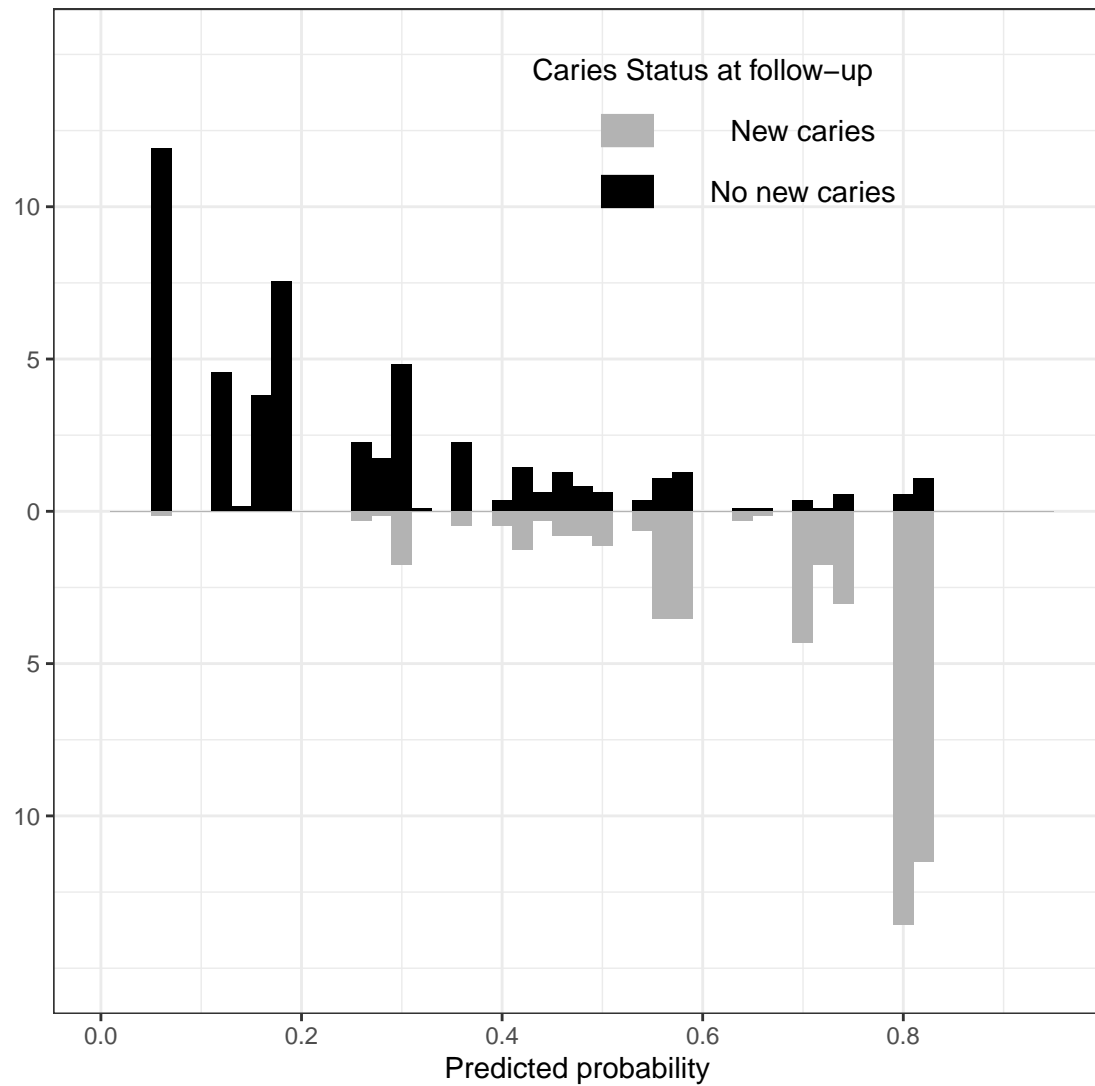

(b)

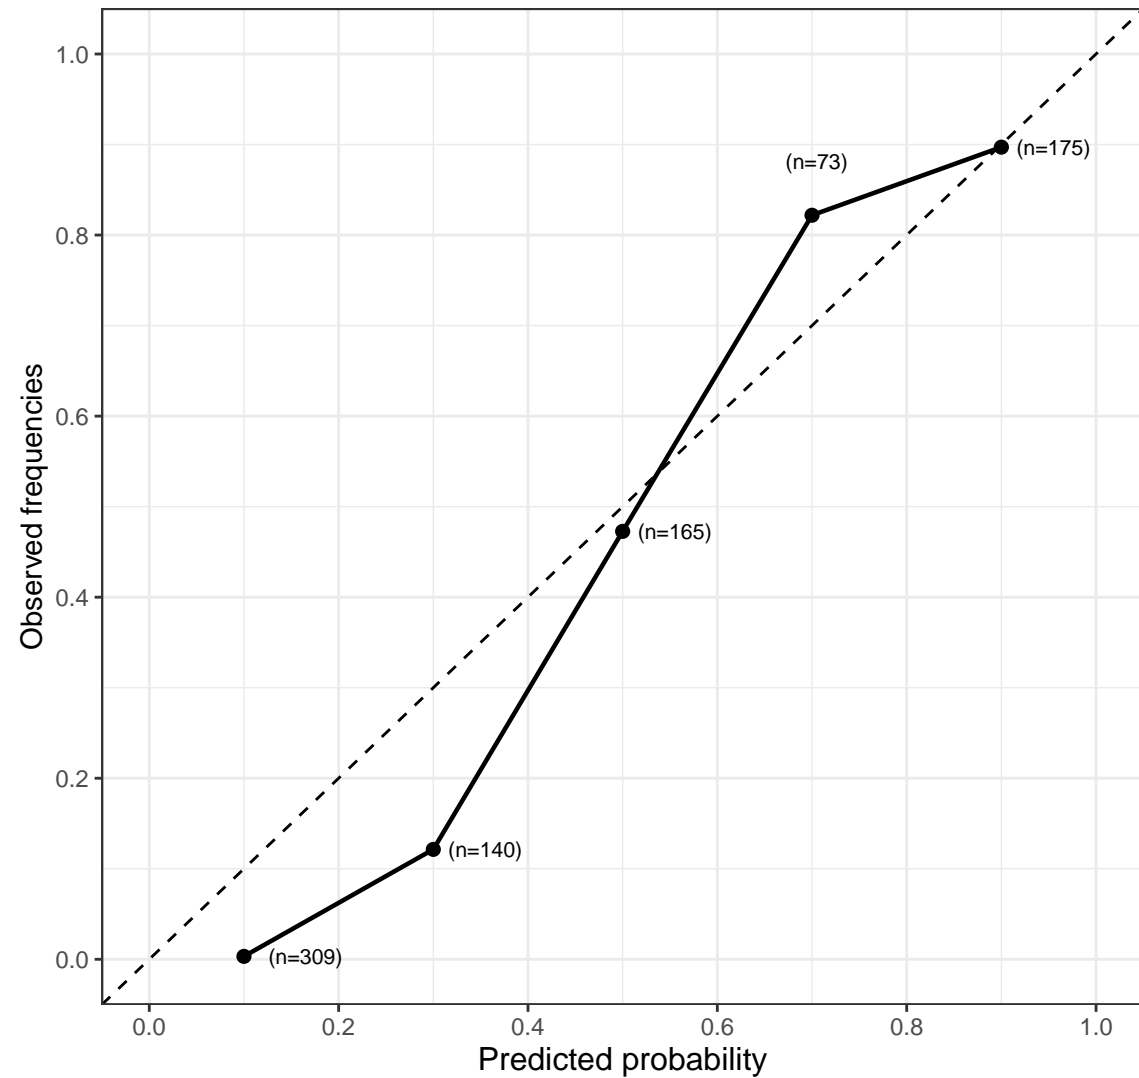

Supplement: Supplementary file 1 [file 1]

Gao et al. 2013 (C), Age: 3

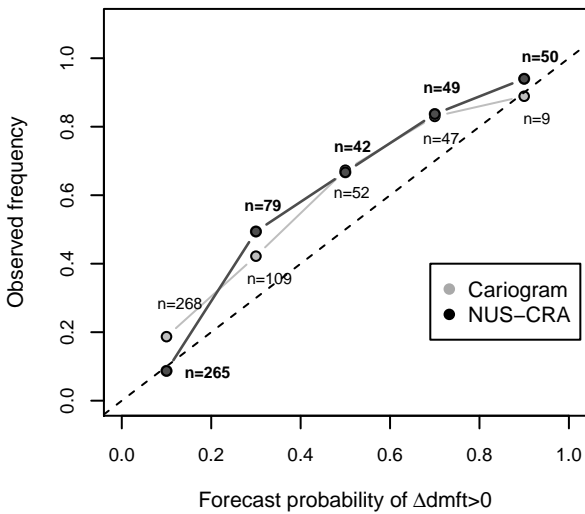

Gao et al. 2013 (S), Age: 3

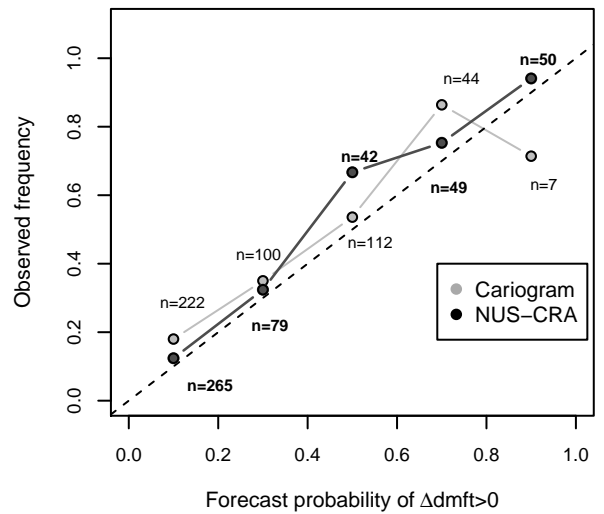

Petersson et al. 2010a (C), Age: 10–11

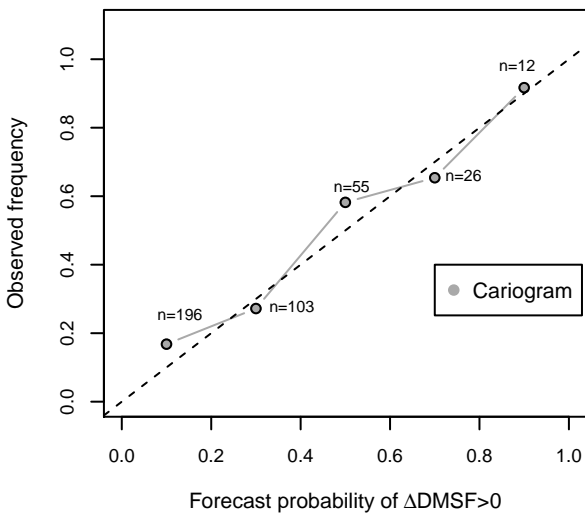

Petersson et al. 2010b (S), Age: 10–11

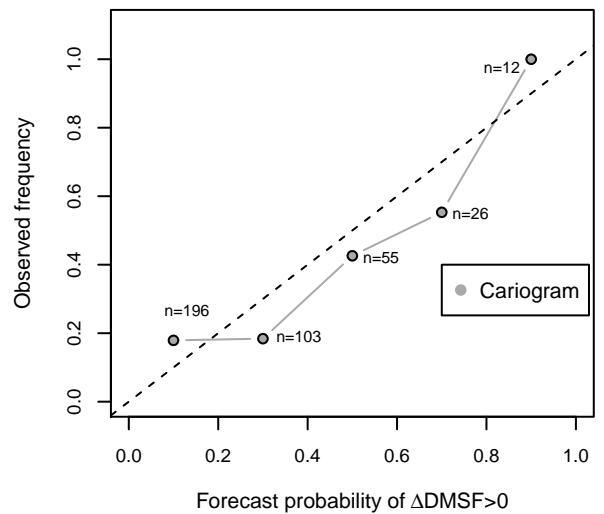

Sudhir et al. 2017 (C), Age: 12

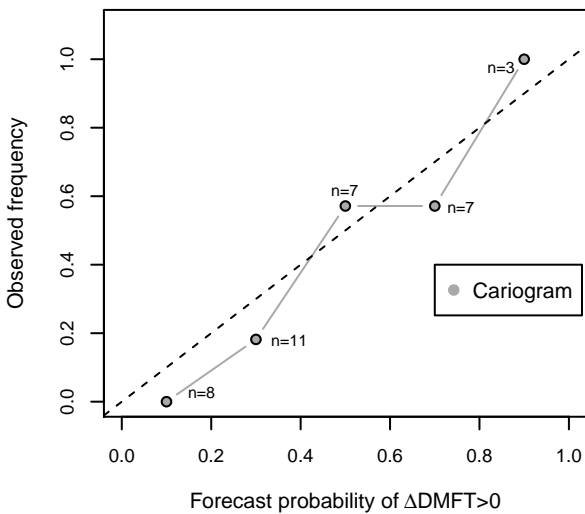

Supplement: Supplementary file 2 [file 1]
